# Supplementary material for: Hypoxia-degradable and long-circulating zwitterionic phosphorylcholine-based nanogel for enhanced tumor drug delivery
Source: PubMed Central journal article supplement — Acta Pharm Sin B. 2020 Aug 26;11(2):560–71. doi: 10.1016/j.apsb.2020.08.012 (PMC7893141; doi:10.1016/j.apsb.2020.08.012), 2020-08-26
Supplement: mmc1.pdf [file mmc1.pdf]

# Supporting Information for

## ORIGINAL ARTICLE

### Hypoxia-degradable and long-circulating zwitterionic phosphorylcholine-based nanogel for enhanced tumor drug delivery

Shaojun Peng<sup>a,b,†</sup>, Boshu Ouyang<sup>d,†</sup>, Yongjie Xin<sup>a</sup>, Wei Zhao<sup>a</sup>, Shun Shen<sup>c,\*</sup>, Meixiao Zhan<sup>a,\*</sup>, Ligong Lu<sup>a,\*</sup>

<sup>a</sup>Zhuhai Precision Medical Center, Zhuhai Interventional Medical Center, Zhuhai People's Hospital (Zhuhai hospital affiliated with Jinan University), Zhuhai 519000, China

<sup>b</sup>The Institute for Translational Nanomedicine, Shanghai East Hospital, Tongji University School of Medicine, Shanghai 200120, China

<sup>c</sup>Zhejiang Cancer Hospital, Institute of Cancer Research, Hangzhou 310012, China

<sup>d</sup>Central Laboratory, First Affiliated Hospital, Institute (College) of Integrative Medicine, Dalian Medical University, Dalian 116021, China

Received 29 April 2020; received in revised form 28 May 2020; accepted 22 June 2020

\*Corresponding authors.

E-mail addresses: nanocarries@gmail.com (Shun Shen), zhanmeixiao1987@126.com (Meixiao Zhan), luligong1969@126.com (Ligong Lu).

†These authors made equal contributions to this work.

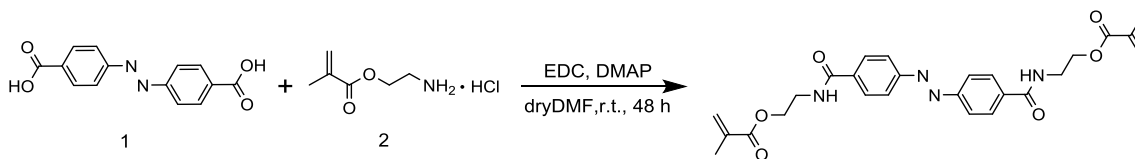

**Scheme S1** The chemical reaction equation and reaction conditions in the fabrication of hypoxia-degradable crosslinker.

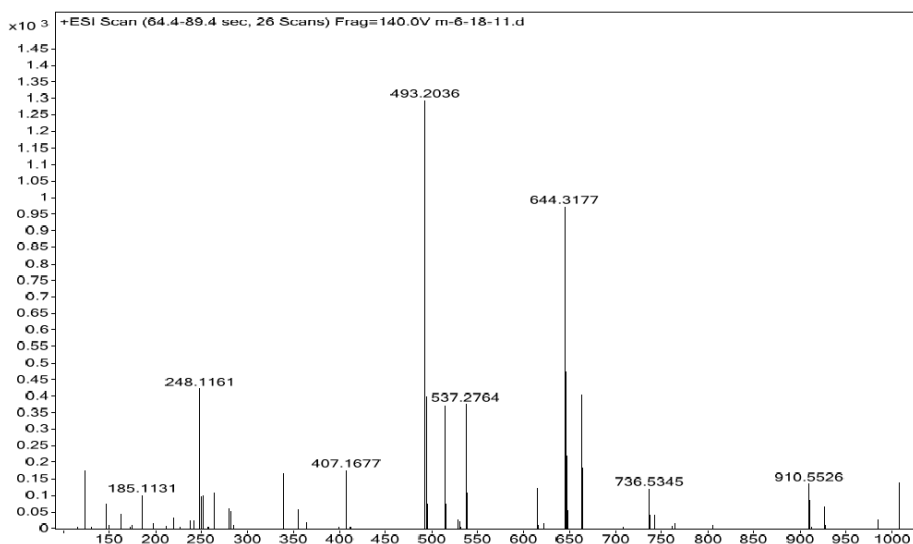

**Figure S1** Mass spectrum of hypoxia-degradable crosslinker, exact mass: 492.20, Found  $[M+H^+]$ :493.20.

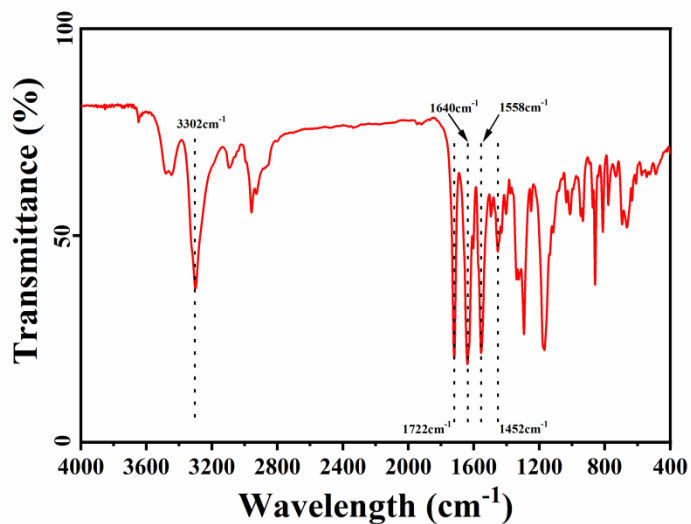

**Figure S2** FT-IR spectra of the hypoxic-degradable crosslinker.

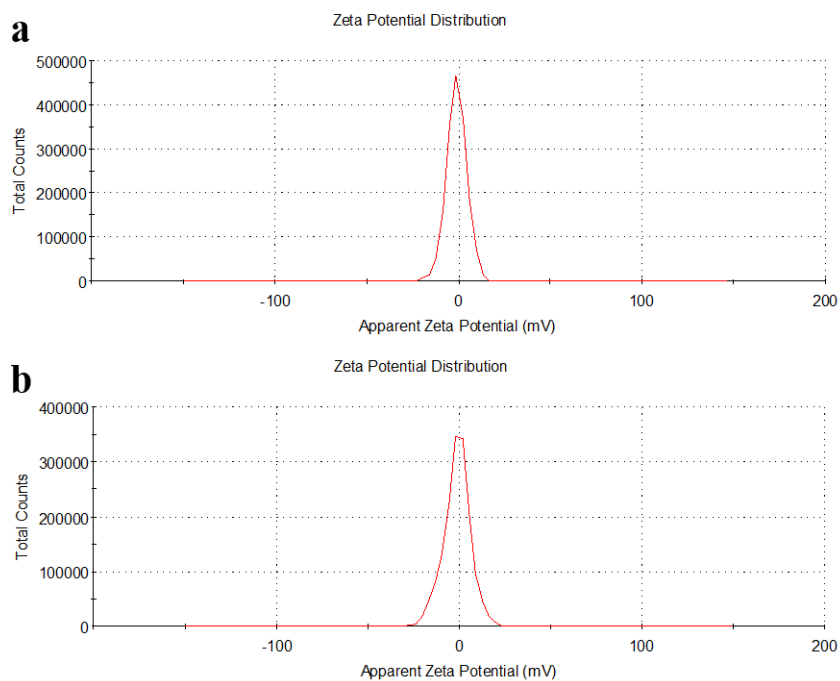

**Figure S3** Zeta potentials of <sup>H</sup>PMPC and <sup>R</sup>PMPC nanogels.

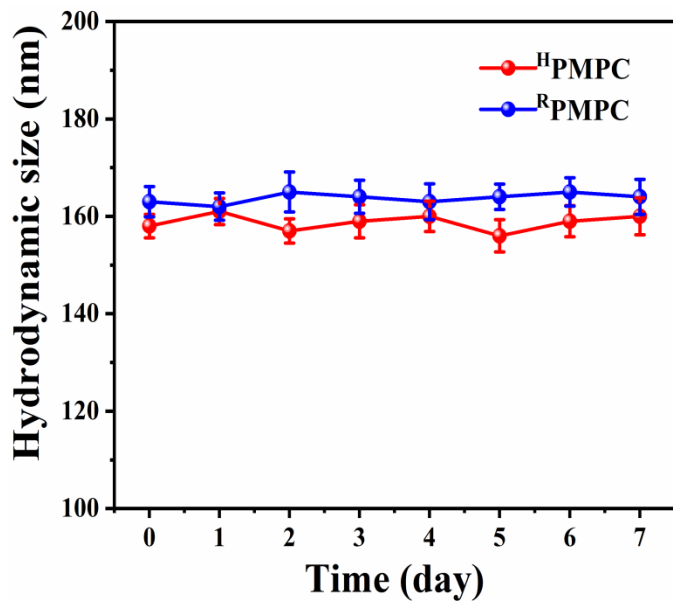

**Figure S4** Hydrodynamic size changes of <sup>H</sup>PMPC and <sup>R</sup>PMPC nanogels in DMEM cell culture for 7 days. Data are expressed as mean  $\pm$ SD,  $n=3$ .

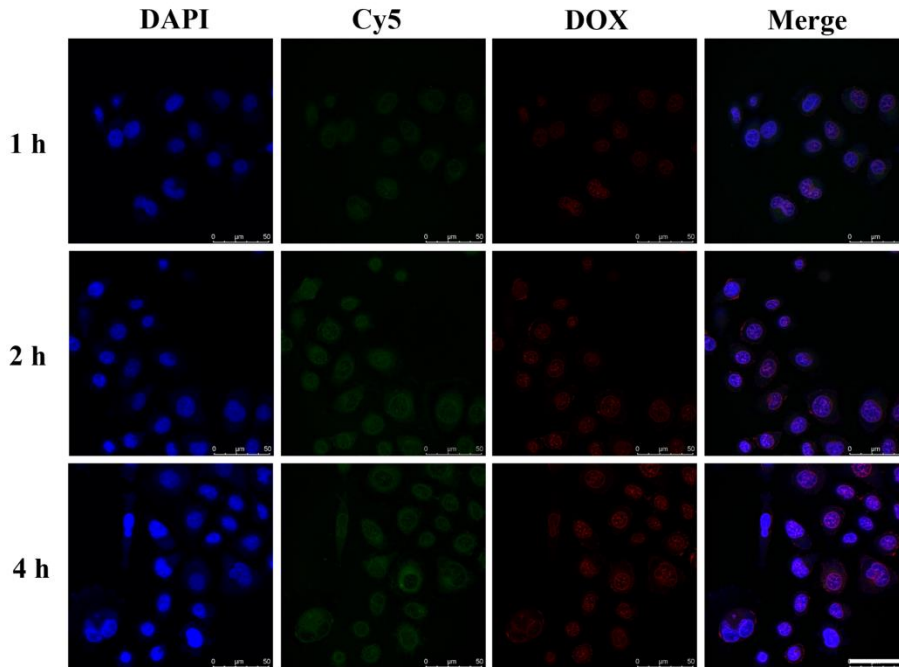

**Figure S5** Confocal laser scanning microscopy observation of  $^H$ PMPC@DOX in normoxic environment. Scale bar = 50  $\mu$ m.

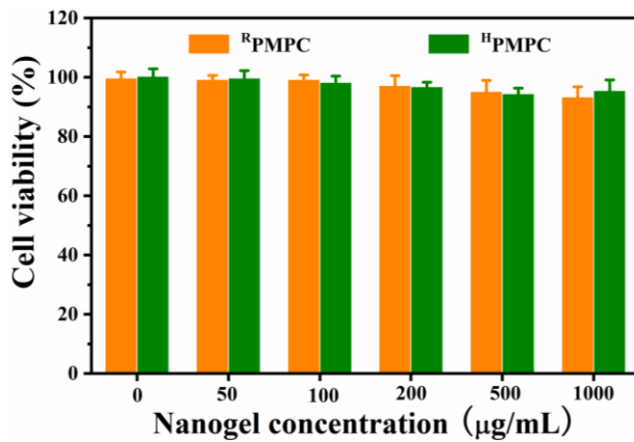

**Figure S6** Toxicity evaluation of blank  $^H$ PMPC and  $^R$ PMPC nanogels to 293T cells. Data are expressed as mean  $\pm$  SD,  $n=5$ .

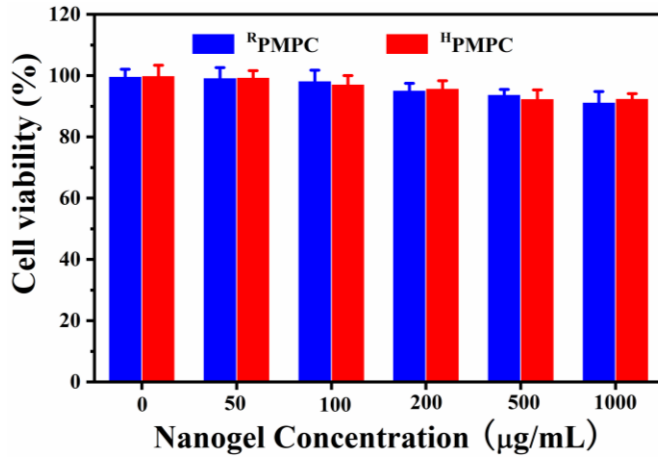

**Figure S7** Toxicity evaluation of blank <sup>H</sup>PMPC and <sup>R</sup>PMPC nanogels to HepG2 cells. Data are expressed as mean ±SD,  $n=5$ .

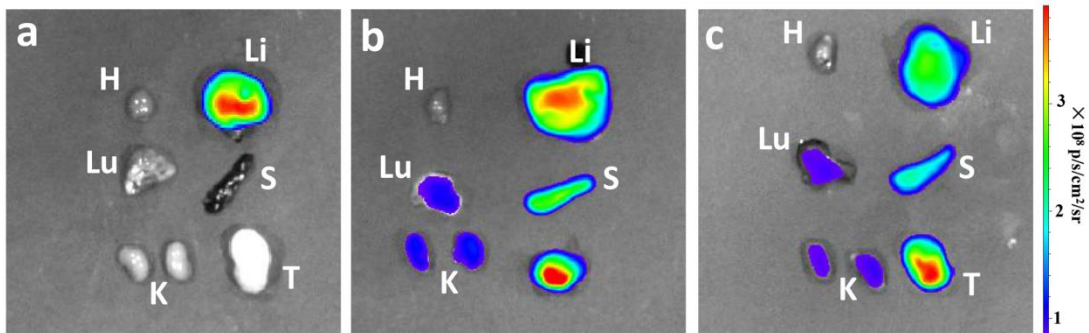

**Figure S8** *Ex vivo* imaging of tumor tissues and major organs at 24 h post-injection. a: free Cy5, b: <sup>R</sup>PMPC, c: <sup>H</sup>PMPC. T: tumor, H: heart, Li: liver, S: spleen, Lu: lung, K: kidney.
